# Supplementary material for: Silencing ATF3 Might Delay TBHP‐Induced Intervertebral Disc Degeneration by Repressing NPC Ferroptosis, Apoptosis, and ECM Degradation
Source: Hindawi journal article supplement (doi:10.1155/2022/4235126), 2022-01-01
Supplement: f2 [file 4235126.f2.pdf]

## Ferroptosis Genes

ALOX12  
ALOX15  
ALOX5  
ATF3  
ATF4  
ATP5MC3  
CBS  
CHAC1  
ELAVL1  
FTH1  
GPX4  
HIF1A  
HMGB1  
HMOX1  
HSPB1  
IREB2  
MAPK14  
RPL8  
NFE2L2  
SLC2A14  
SLC3A2  
SLC40A1  
SLC7A11  
TF  
TFRC  
TP53  
VDAC2  
LONP1  
SRC  
STAT3  
TMBIM4  
TP63  
ZFP36  
SQSTM1  
PROM2  
RB1  
SCD  
SESN2  
NFS1  
NQO1  
OTUB1  
PLIN2  
PML  
PRDX6  
HELLS  
HSF1

MT1G  
MTOR  
MUC1  
NF2  
HSPA5  
ISCU  
JUN  
LAMP2  
FTMT  
GCH1  
GCLC  
CHMP6  
CISD1  
CISD2  
ENPP2  
FADS2  
FANCD2  
Fer1HCH  
FH  
BRD4  
CA9  
CAV1  
AGPAT3  
CD44  
CDKN1A  
CHMP5  
AIFM2  
AKR1C1  
AKR1C2  
AKR1C3  
ARNTL  
ACSL3  
ALB  
ANGPTL7  
ARRDC3  
ASNS  
ATP6V1G2  
AURKA  
BLOC1S5-TXNDC  
BNIP3  
CAPG  
CEBPG  
CXCL2  
DDIT3  
DDIT4  
DRD4  
DRD5

DUSP1  
EIF2AK4  
EIF2S1  
FTL  
GABPB1  
GDF15  
GLUT13  
GPT2  
GPX2  
HAMP  
HBA1  
HERPUD1  
HIC1  
HNF4A  
HSD17B11  
IL33  
IL6  
JDP2  
KIM-1  
KLHL24  
LURAP1L  
MAFG  
MAP3K5  
MT3  
NCF2  
NGB  
NNMT  
NOS2  
OXSRI  
PCK2  
PLIN4  
PRDX1  
PSAT1  
PTGS2  
RELA  
RGS4  
RIPK1  
RRM2  
SETD1B  
SELENOS  
SLC1A4  
SLC2A1  
SLC2A12  
SLC2A3  
SLC2A6  
SLC2A8  
SLC7A5

SNORA16A  
SP1  
SRXN1  
STEAP3  
STMN1  
TFAP2C  
TRIB3  
TSC22D3  
TUBE1  
TXNIP  
TXNRD1  
UBC  
VEGFA  
VLDLR  
XBP1  
YWHAE  
ZFP69B  
ZNF419  
CS  
EMC2  
NOX1  
CYBB  
NOX3  
NOX4  
NOX5  
DUOX1  
DUOX2  
G6PD  
PGD  
PIK3CA  
FLT3  
SCP2  
ACSL4  
LPCAT3  
NRAS  
KRAS  
HRAS  
TFR2  
SLC38A1  
SLC1A5  
GLS2  
GOT1  
CARS1  
KEAP1  
ATG5  
ATG7  
NCOA4

ALOX12B  
ALOX15B  
ALOXE3  
PHKG2  
ACO1  
G6PDX  
ULK1  
ATG3  
ATG4D  
BECN1  
MAP1LC3A  
GABARAPL2  
GABARAPL1  
ATG16L1  
WIPI1  
WIPI2  
SNX4  
ATG13  
ULK2  
SAT1  
EGFR  
MAPK3  
MAPK1  
BID  
ZEB1  
DPP4  
CDKN2A  
PEBP1  
SOCS1  
CDO1  
MYB  
MAPK8  
MAPK9  
LINC00472  
PRKAA2  
PRKAA1  
BAP1  
ABCC1  
MIR6852  
ACVR1B  
TGFBR1  
EPAS1  
HILPDA  
IFNG  
ANO6  
LPIN1  
TNFAIP3

TLR4  
ATM  
YY1AP1  
EGLN2  
MIOX  
TAZ  
MTDH  
IDH1  
SIRT1  
FBXW7  
PANX1  
DNAJB6  
BACH1  
ACSF2
